# Supplementary material for: Multi-responsive shape memory and self-healing hydrogels with gold and silver nanoparticles
Source: Royal Society of Chemistry journal article supplement (doi:10.1039/d4tb01720j), 2024-11-18
Supplement: d4tb01720j1.pdf [file d4tb01720j1.pdf]

## Supporting Information for

# Multi-Responsive Shape Memory and Self-Healing Hydrogels with Gold and Silver Nanoparticles

Hüsna Kılıç<sup>a</sup>, Deniz Ceylan<sup>b\*</sup>

<sup>a</sup>Bezmialem Vakıf University Health Sciences Institute, Department of Biotechnology, 34093 Istanbul, Turkey

<sup>b</sup>Bezmialem Vakıf University, Faculty of Pharmacy, 34093 Istanbul, Turkey

\*[deniz.ceylan@bezmialem.edu.tr](mailto:deniz.ceylan@bezmialem.edu.tr)

### Table of Contents

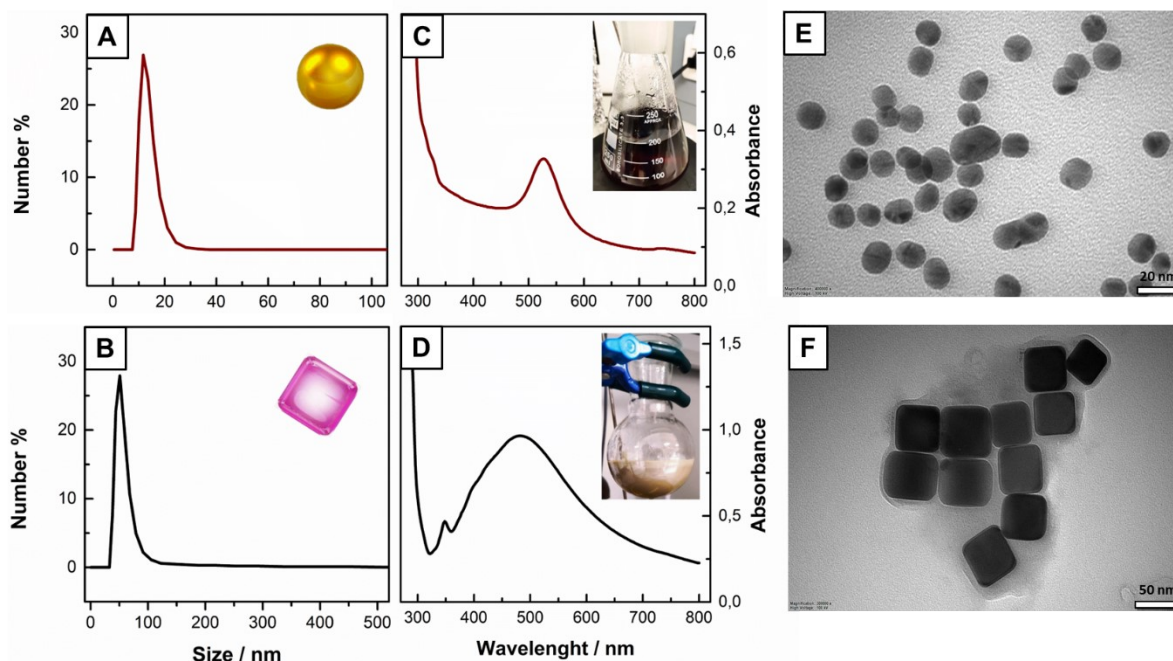

**Figure S1.** Characterization of PVP-coated gold nanosphere (AuNS@PVP) and silver nanocube (AgNC) particles in water (A-B). DLS measurement graph, (C-D). UV-Vis spectrum and (E-F). TEM images obtained at 20x and 50x magnifications, respectively.

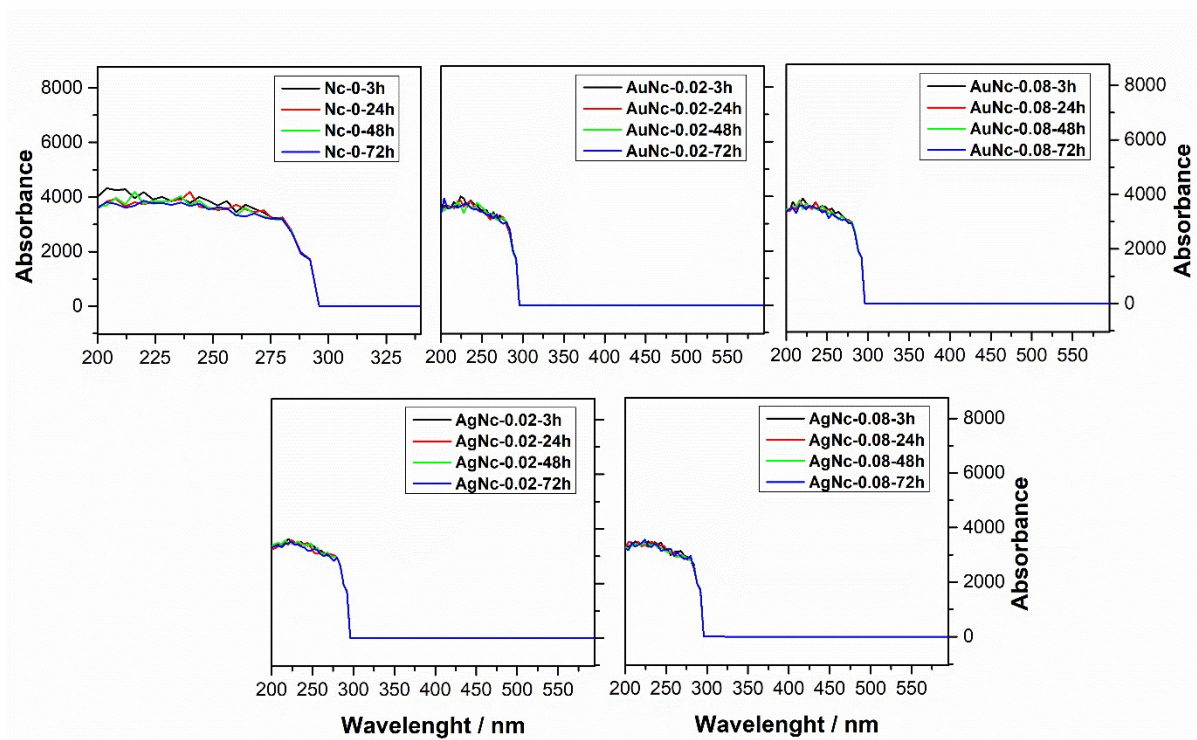

**Figure S2.** UV-Vis spectra of supernatants collected after immersion of Nc-0, Au/AgNc-x nanoparticle-loaded swollen hydrogels in water at different time intervals (3, 24, 48, and 72 hours).

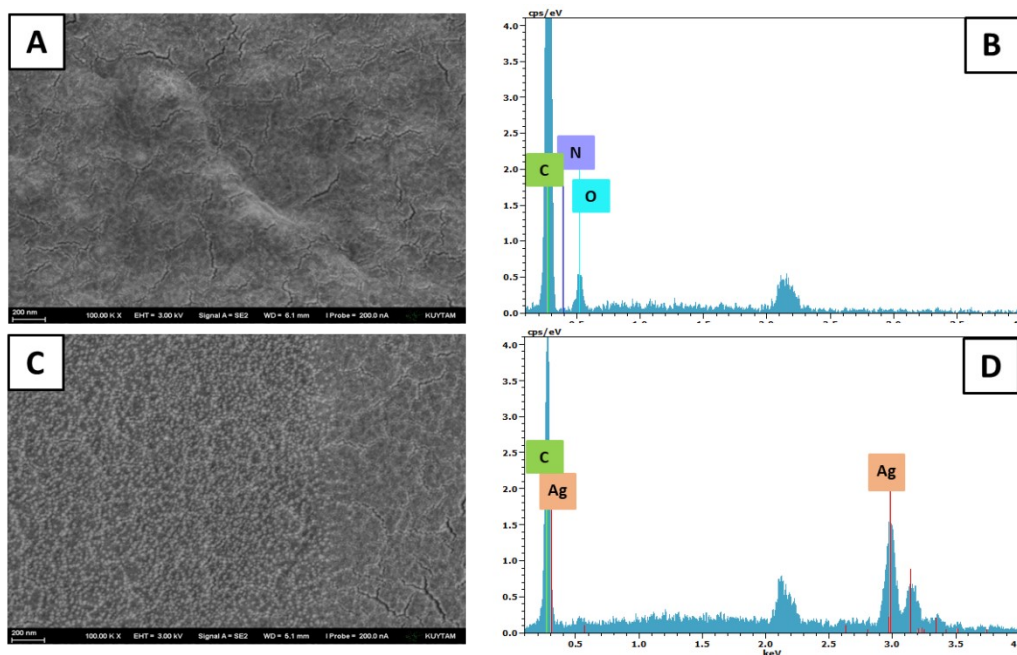

**Figure S3.** SEM images and EDX analysis results of Nc-0 (A and B) and AgNc-0.08 gels (C and D) after synthesis. The scale bars represent 200 nm.

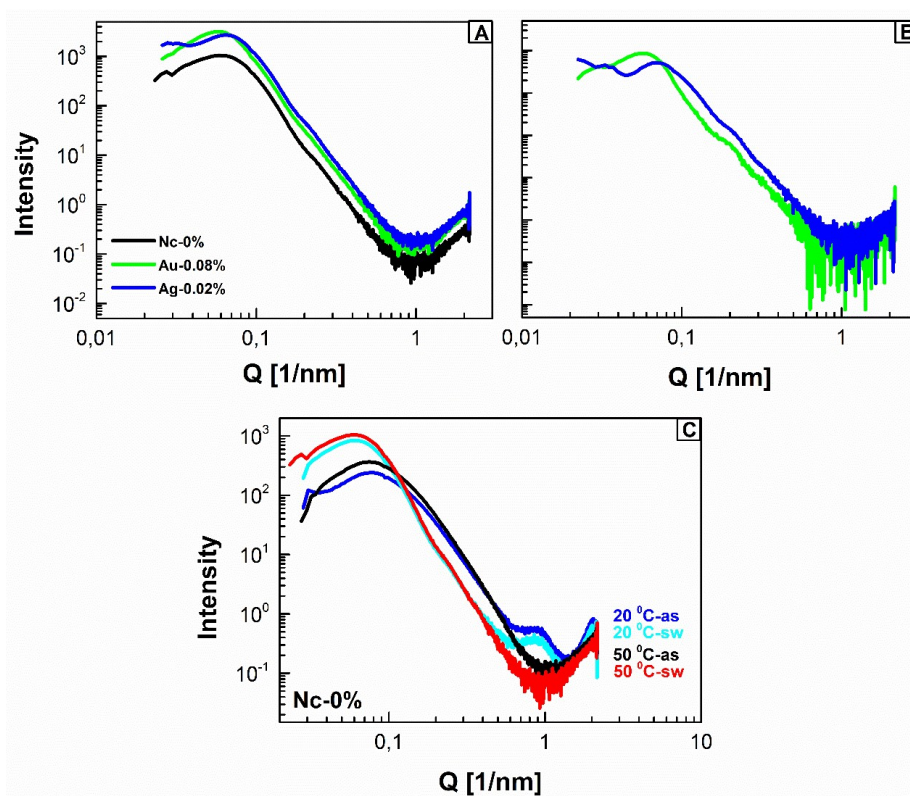

**Figure S4.** SAXS patterns at 50 °C of swollen (A) Nc-0, AuNc-0.08 and AgNc-0.02 gels (B) Nc-0 subtracted patterns of Au-0.08 and Ag-0.02 gels and (C) Nc-0 SAXS patterns of the gel obtained at 20 °C and 50 °C after synthesis and in the swollen state.

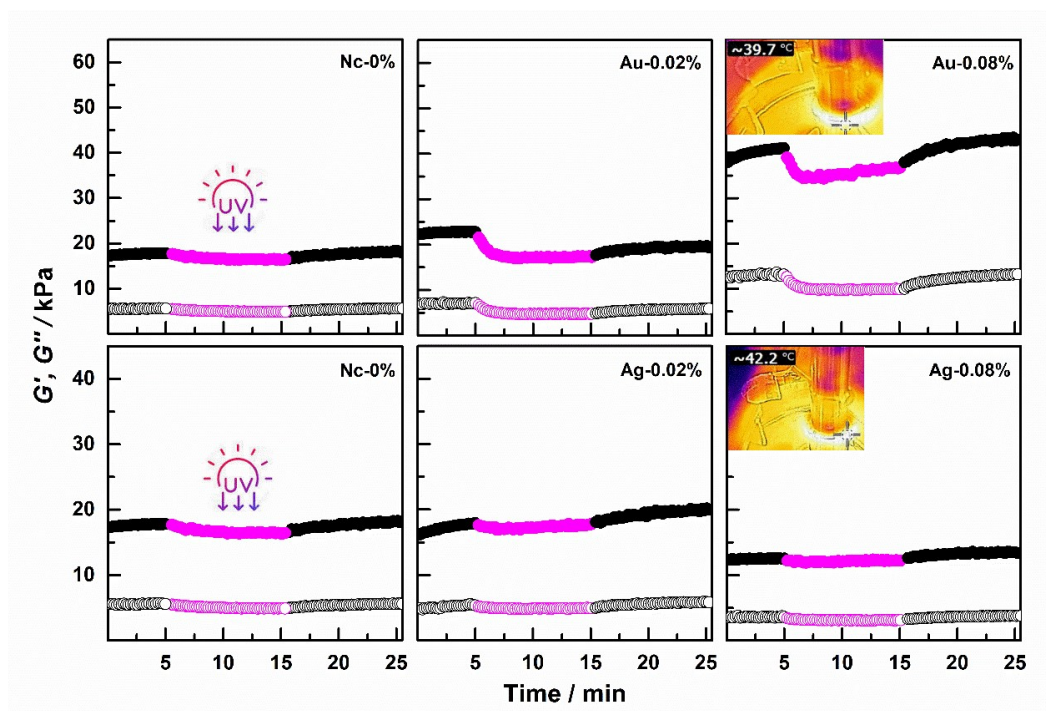

**Figure S5.** Time dependent variation of storage modulus ( $G'$ , filled symbols) and loss module ( $G''$ , open symbols) in swollen state Nc-0, AuNc-x and AgNC-x gels at 37 °C with and without UV using a UV light source of 365 nm, 200-700 nm and 400-500 nm, respectively.

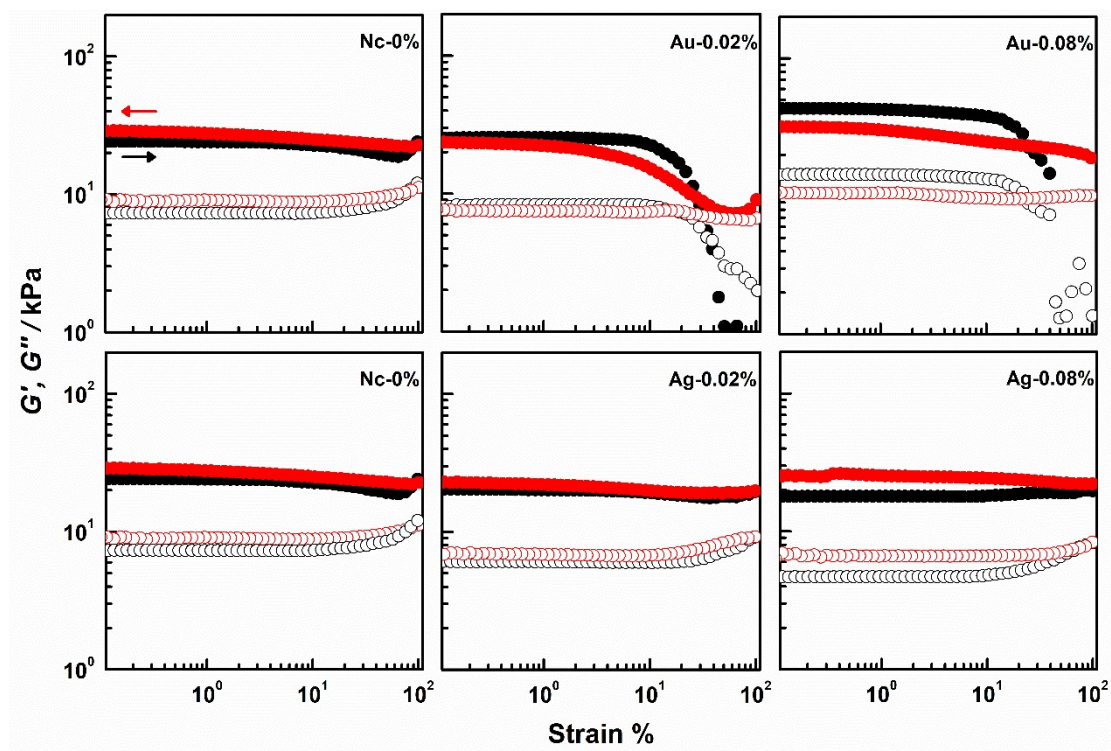

**Figure S6.** Deformation sweeps analysis of swollen state Nc-0, AuNc-x and AgNC-x networks. The deformation varied from 0.1% to 100% (black symbols) and 100% to 0.1% (red symbols) at a fixed frequency of 1 Hz at 37 °C. The x values are indicated in the graphs, with storage module ( $G'$ ) filled symbols and loss module ( $G''$ ) with open symbols.

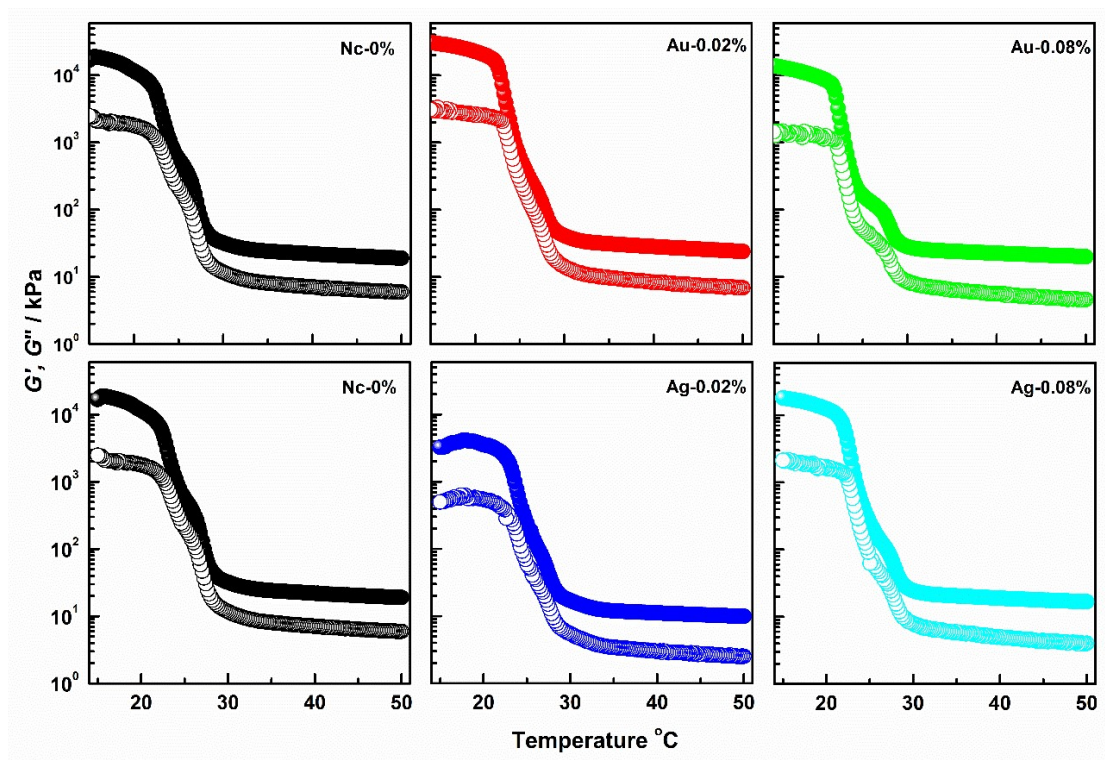

**Figure S7.** Temperature dependency of  $G'$  (filled symbols) and  $G''$  (open symbols) for the swollen-sw state Nc-0, AuNc-x ve AgNC-x network.

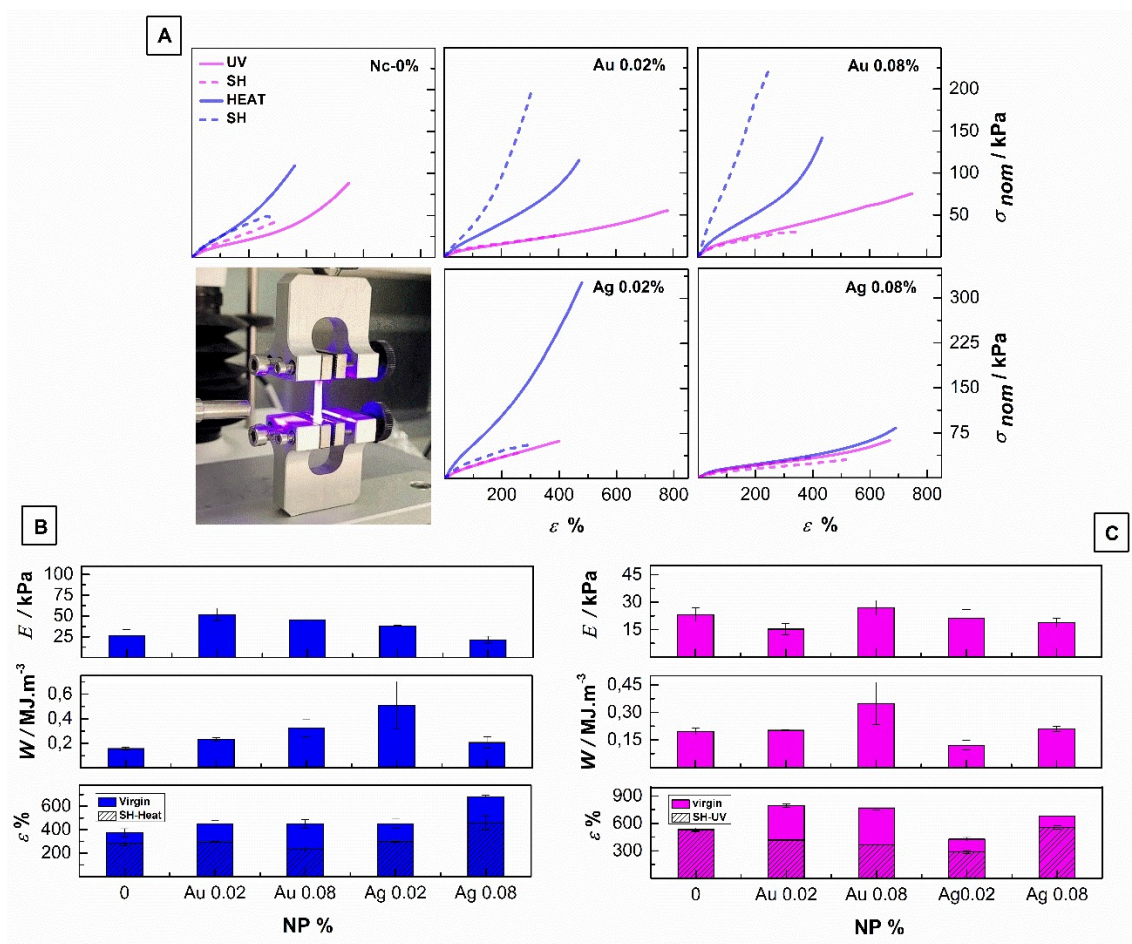

**Figure S8.** (A) Tensile stress-strain plots of virgin (blue and pink lines) and self-healed (SH- blue and pink dashed lines), Nc-0, AuNc-x and AgNc-x networks under temperature (blue) and appropriate UV light source (pink). (B) Young's modulus  $E$ , toughness  $W$ , fracture stress  $\sigma_f$  and elongation at break  $\epsilon$  % as a function of temperature (blue) and (C) light (pink) were plotted against the ratio of Nc-0, AuNc-x and AgNc-x.

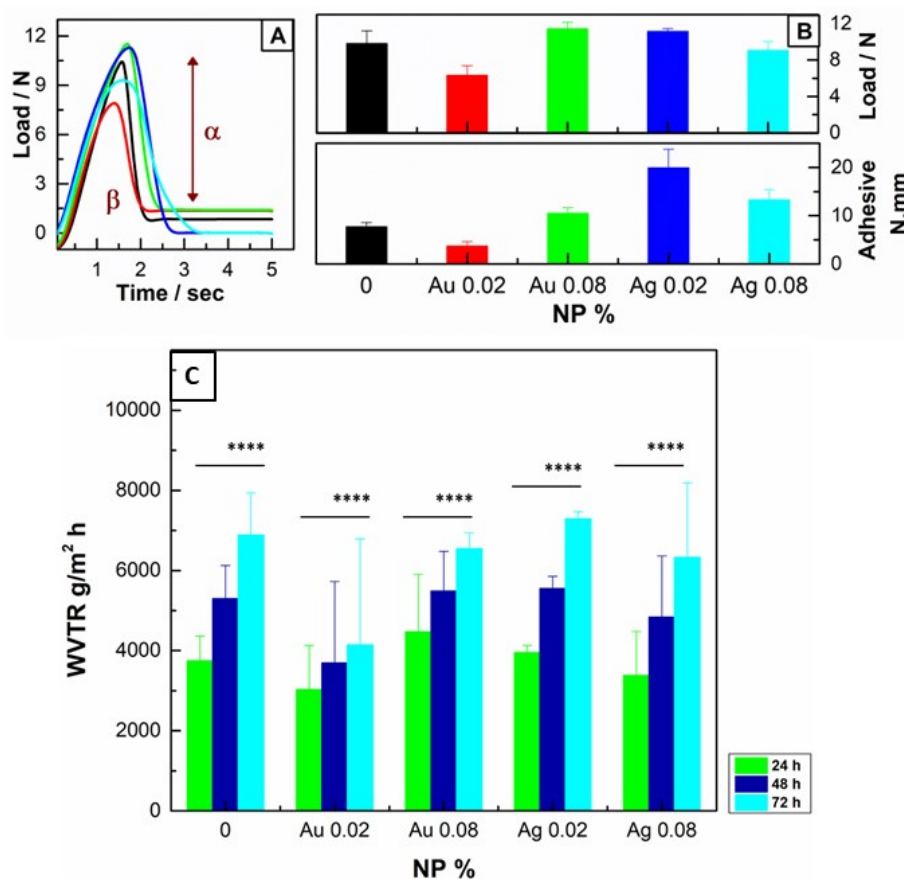

**Figure S9.** Adhesion tests of Nc-0, AuNc-x and AgNc-x gels at 37 °C on the Texture Analyzer. (A) Detachment profile (obtained from the force/distance curve),  $\alpha$  is the maximum detachment force and  $\beta$  (area under the curve) is the total adhesion work, (B) plots of the detachment profile and total adhesion of Nc-0, AuNc-x and AgNc-x gels. (C) Water vapor transmission rate monitoring of Nc-0 and Nc-x hydrogels at 50% relative humidity and 37 °C after 24h, 48h and 72h.



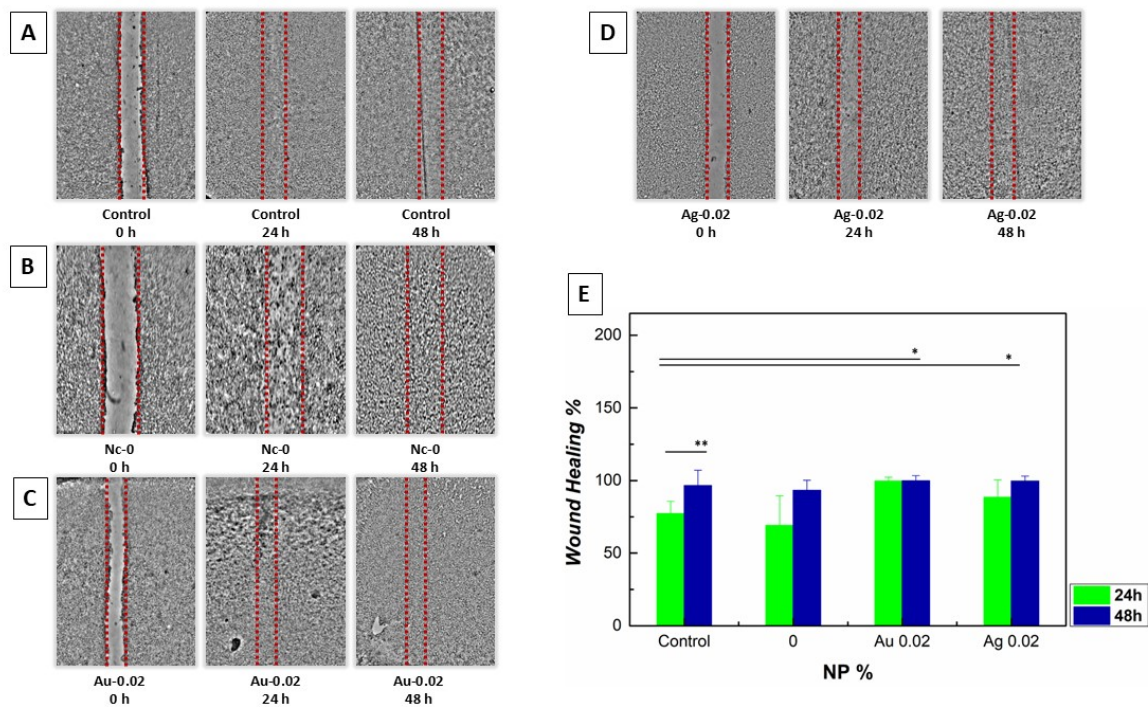

**Figure S10.** Microscope images showing the effects of (A) control, (B) Nc-0, (C) Au-0.02, (D) Ag-0.02 gels at  $t = 0, 24$  and  $48$  hours on CCD-986Sk human skin fibroblast cells and (E) shows the percentage of wound healing with and without treatment.
